# Supplementary material for: Improvement of Platelet Respiration by Cell–Permeable Succinate in Diabetic Patients Treated with Statins
Source: PubMed Central journal article supplement (PMC8065590; doi:10.3390/life11040288), 2021-03-28
Supplement: life-11-00288-s001.pdf [file life-11-00288-s001.pdf]

**Table S1. Characteristics of study participants.**

| No. | Age | Gender | TC<br>(mg/dL) | LDL-C<br>(mg/dL) | TG<br>(mg/dL) | HDL-C<br>(mg/dL) | LDL-C/HDL-C | Thrombotic<br>events | Statin dosage      | Duration of<br>diabetes (y) |
|-----|-----|--------|---------------|------------------|---------------|------------------|-------------|----------------------|--------------------|-----------------------------|
| 1   | 47  | F      | 253           | 155              | 271           | 47               | 3.30        | NO                   | -                  | 6                           |
| 2   | 68  | F      | 244           | 156              | 220           | 57               | 2.74        | NO                   | -                  | 15                          |
| 3   | 39  | M      | 215           | 154              | 148           | 31               | 4.97        | NO                   | -                  | 2                           |
| 4   | 66  | F      | 186           | 116              | 183           | 33               | 3.52        | YES                  | -                  | 12                          |
| 5   | 63  | M      | 171           | 119              | 95            | 54               | 2.20        | YES                  | Atorvastatin 10 mg | 20                          |
| 6   | 60  | F      | 149           | 73               | 154           | 49               | 1.49        | NO                   | Atorvastatin 10 mg | 11                          |
| 7   | 79  | M      | 113           | 67               | 141           | 30               | 2.23        | NO                   | Atorvastatin 20 mg | 10                          |
| 8   | 69  | F      | 194           | 106              | 96            | 69               | 1.54        | NO                   | Atorvastatin 20 mg | 5                           |
| 9   | 58  | M      | 132           | 85               | 108           | 34               | 2.50        | YES                  | Atorvastatin 40 mg | 14                          |
| 10  | 62  | M      | 152           | 79               | 280           | 37               | 2.14        | YES                  | Rosuvastatin 10 mg | 15                          |
| 11  | 67  | M      | 164           | 109              | 173           | 30               | 3.63        | NO                   | Rosuvastatin 10 mg | 14                          |
| 12  | 53  | M      | 119           | 60               | 42            | 47               | 1.28        | NO                   | Rosuvastatin 10 mg | 6                           |
| 13  | 48  | F      | 143           | 83               | 200           | 32               | 2.59        | NO                   | Rosuvastatin 20 mg | 19                          |

**Table S2. Comorbidities and concomitant medication of study participants.**

| <b>No.</b> | <b>Hypertension</b> | <b>Retinopathy</b> | <b>Chronic kidney disease</b> | <b>Cerebrovascular disease</b> | <b>Coronary heart disease</b> | <b>Antiplatelet medication</b> | <b>Antihypertensive medication</b>               |
|------------|---------------------|--------------------|-------------------------------|--------------------------------|-------------------------------|--------------------------------|--------------------------------------------------|
| 1          | YES                 | YES                | NO                            | NO                             | YES                           | NO                             | perindopril; indapamid; nebivolol                |
| 2          | YES                 | NO                 | NO                            | NO                             | YES                           | NO                             | candesartan; amlodipin;                          |
| 3          | YES                 | NO                 | NO                            | NO                             | NO                            | NO                             | perindopril                                      |
| 4          | YES                 | YES                | NO                            | NO                             | NO                            | YES                            | perindopril; indapamid; nebivolol                |
| 5          | YES                 | YES                | YES                           | YES                            | YES                           | YES                            | perindopril; amlodipin; bisoprolol               |
| 6          | YES                 | NO                 | NO                            | NO                             | NO                            | YES                            | perindopril; indapamid; nebivolol                |
| 7          | YES                 | NO                 | NO                            | YES                            | NO                            | NO                             | ramipril; furosemide; spironolactone; bisoprolol |
| 8          | YES                 | NO                 | NO                            | NO                             | NO                            | NO                             | perindopril                                      |
| 9          | YES                 | YES                | YES                           | NO                             | YES                           | YES                            | perindopril; indapamid; nebivolol; amlodipin     |
| 10         | YES                 | NO                 | YES                           | YES                            | YES                           | NO                             | perindopril; indapamid; nebivolol; amlodipin     |
| 11         | YES                 | NO                 | YES                           | NO                             | NO                            | YES                            | perindopril; indapamid; carvedilol; amlodipin    |
| 12         | YES                 | NO                 | NO                            | NO                             | NO                            | NO                             | perindopril; indapamid                           |
| 13         | YES                 | NO                 | YES                           | NO                             | NO                            | NO                             | candesartan; nebivolol                           |
